# Supplementary material for: Macromolecular and electrical coupling between inner hair cells in the rodent cochlea
Source: PubMed Central journal article supplement (PMC7316811; doi:10.1038/s41467-020-17003-z), 2020-06-25
Supplement: 41467_2020_17003_MOESM1_ESM.pdf [file 41467_2020_17003_MOESM1_ESM.pdf]

## Supplementary figures

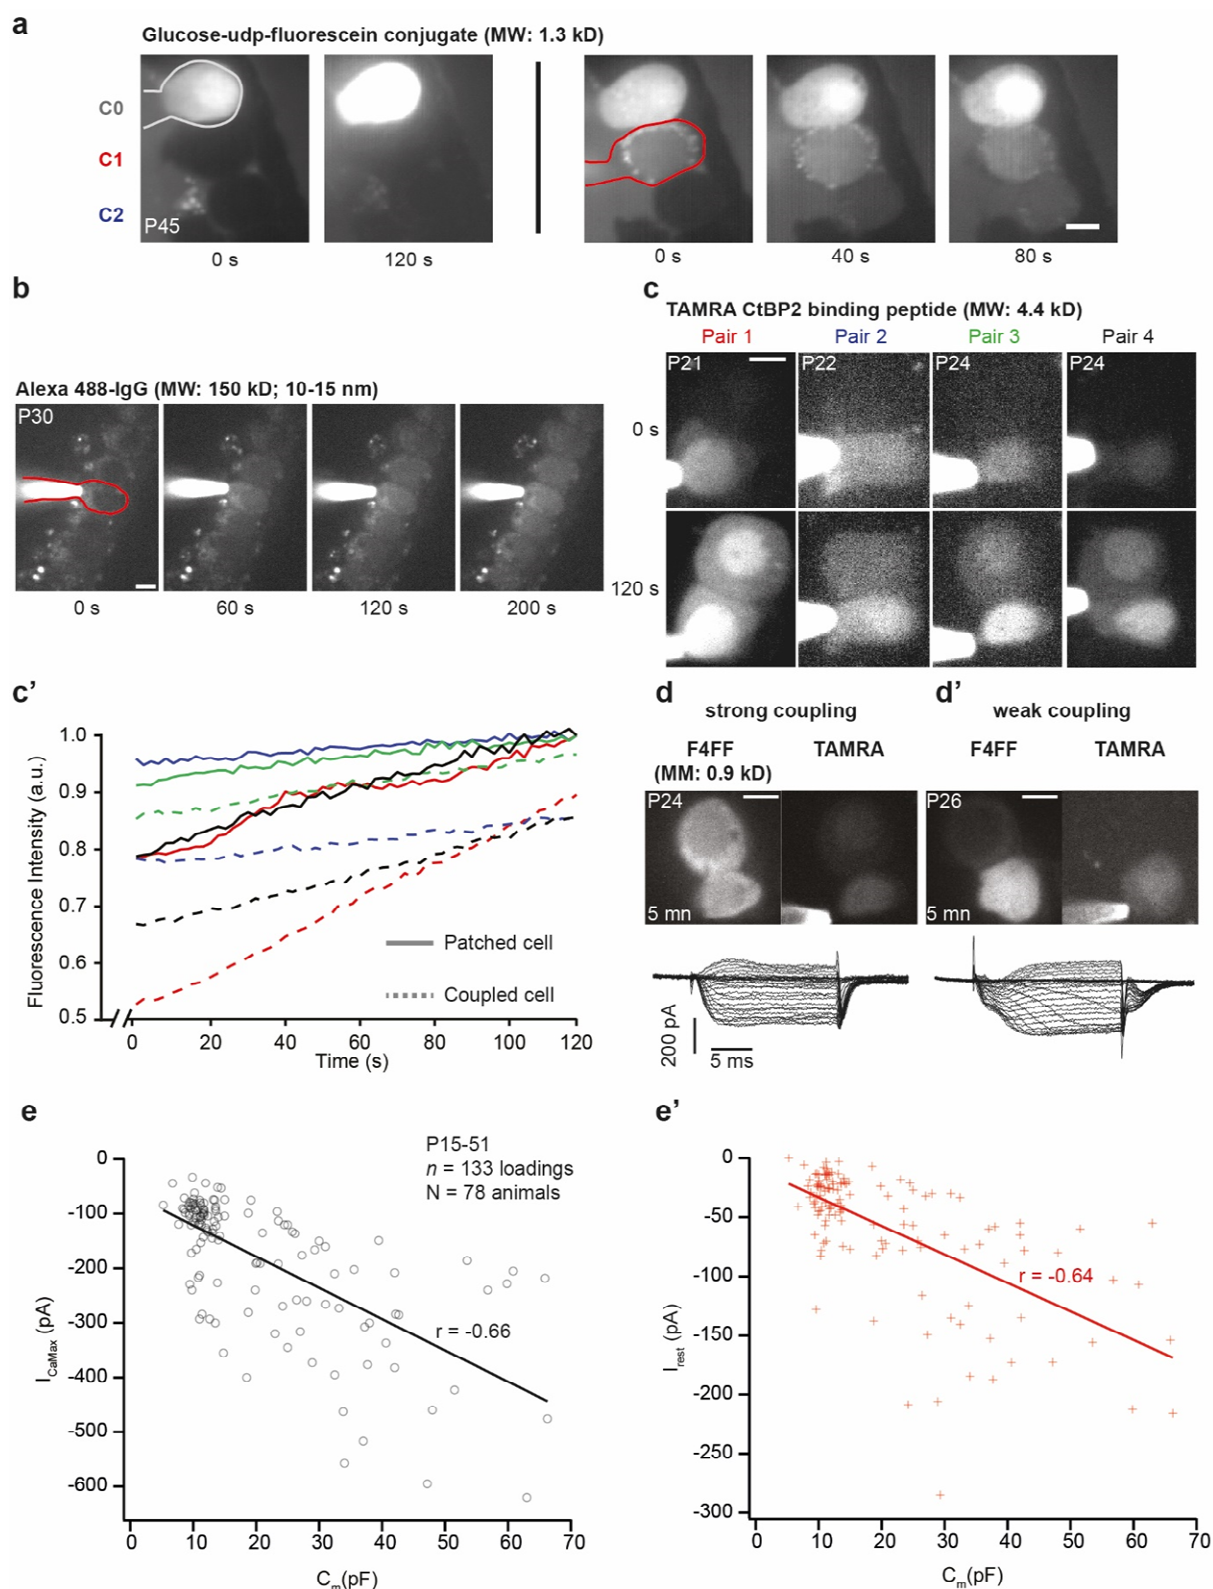

**Supplementary figure 1. Different levels of molecular and electrical coupling exist between IHCs.** (a) Time series of fluorescently labeled glucose loading in a single, non-coupled IHC (C0, no spread to other IHCs) and coupled IHC (C1) that shared glucose with the coupled IHC (C2). (b) Time series of the Alexa 488-IgG loading among 7 coupled IHCs. The patched IHC is delineated in red. (c) The pictures illustrate the TAMRA-peptide loading of four different pairs of IHCs. (c') Mean fluorescence intensities of the patched IHCs (solid line) and their coupled IHCs (dashed line) over time from the loadings in (b). The fluorescence is normalized to the maximal fluorescence of the

patched cell (line). **(d)** Example picture of a strong IHC-IHC coupling where the F4FF and TAMRA peptide are equally loaded in both coupled IHCs after 5 min, resulting in a monophasic activation of the whole-cell  $\text{Ca}^{2+}$ -current from depolarization steps. **(d')** The weak IHC-IHC coupling example shows much weaker intensities for F4FF and TAMRA in the non-patched cell, with a whole-cell  $\text{Ca}^{2+}$ -current exhibiting multiple phases of activation. **(e-e')** Scatter plot and line fits relating  $I_{\text{CaMax}}$  (e) and  $I_{\text{rest}}$  (e') currents from step depolarizations against  $C_m$  values across all age groups from ruptured-patch experiments in 1.3, 2 or 5  $[\text{Ca}^{2+}]_e$ . *Abbreviations: a. u., arbitrary units. Scale bars: 5  $\mu\text{m}$ .*

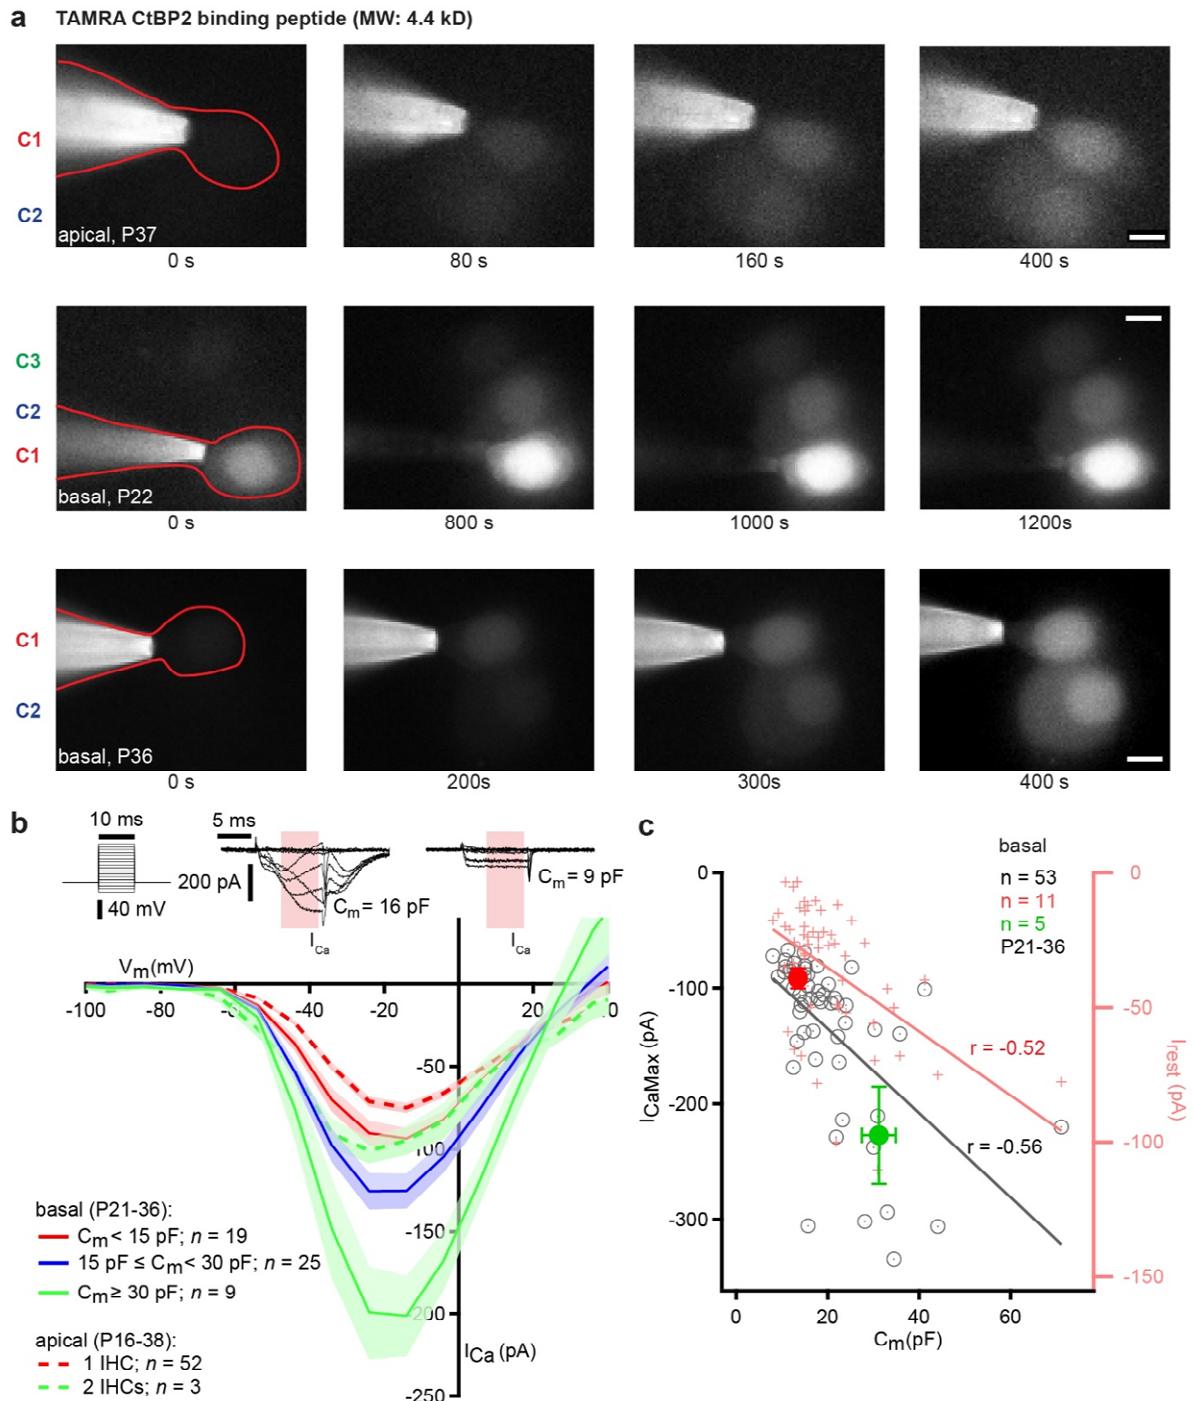

**Supplementary figure 2. Macromolecular and electrical IHC-coupling in the high- and low-frequency cochlea of the gerbil.** **(a)** Fluorescence images taken during loading of TAMRA-peptide through the patch pipette into the IHC. In addition to the patched cell (C1), one IHC (first row; C2) in the apical cochlea and two (second row; C2-3) IHCs or one (third row; C2) neighboring IHC in the basal cochlea were also loaded with the fluorescent dye, demonstrating a molecular coupling between

these cells. Note that in the right three panels of the second row, the pipette is slightly out of focus due to drift. In the basal cochlea, the mean  $C_m$  of non-coupled, single IHCs (as demonstrated by the lack of TAMRA-fluorescence spread) was  $13.5 \pm 0.7$  pF ( $n = 11$  loadings). When the dye loaded into 2 or 3 neighboring cells, the  $C_m$  read-out was  $31.0 \pm 4.0$  pF ( $n = 5$  loadings). In the apical part the  $C_m$  values for non-coupled IHCs were  $14.3 \pm 0.3$  pF ( $n = 52$  loadings) and  $29.8 \pm 4.6$  pF ( $n = 3$  loadings) for coupled IHCs. Values are shown as mean  $\pm$  S.E.M. **(b)** Current-voltage relationship obtained by 10-ms long depolarizations of increasing voltages (10 mV-increments) from IHCs of either basal or apical turn ( $N_{\text{animals}} = 42$  (basal turn recordings) and  $N_{\text{animals}} = 17$  (apical turn recordings), respectively).  $\text{Ca}^{2+}$  currents were significantly larger in dye-filled coupled cells or cells with  $C_m$  values from 15-30 pF and above 30 pF (likely representing coupled cells) as compared to cells with  $C_m$  values smaller than 15 pF. In some cells with large  $C_m$ , the  $\text{Ca}^{2+}$  current activation displayed multiple time constants (middle insert), likely due to a delayed channel activation in the incompletely clamped neighboring cells. **(c)** The relation between the resting membrane capacitance  $C_m$  and the maximal depolarization-evoked  $\text{Ca}^{2+}$  current  $I_{\text{CaMax}}$  (gray circles, Pearson correlation coefficient:  $r = -0.56$ ,  $p < 0.0001$ ), as well as the resting current  $I_{\text{rest}}$  (red crosses, Pearson correlation coefficient:  $r = -0.52$ ,  $p < 0.0001$ ) in the basal cochlea ( $n = 53$  basal cells from the panel b). Mean values for  $C_m$  and  $I_{\text{CaMax}}$  and their respective S.E.M. for single-dye-filled (red;  $n = 11$ ) and coupled-dye-filled (green;  $n = 5$ ) IHCs are presented as filled dots with error bars. Data was obtained across all age groups (P16-38) using ruptured patch experiments with 1.3 mM extracellular  $\text{Ca}^{2+}$ . *Abbreviations: IHC, inner hair cell Scale bars: 5  $\mu\text{m}$ .*

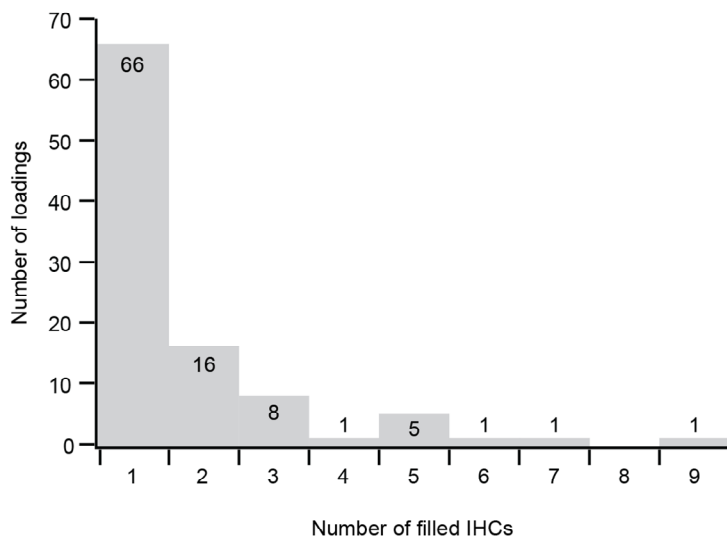

**Supplementary figure 3: Distribution of dye-filled IHC numbers in the temporal bone preparation.** Histogram displaying the number of dye-filled IHCs per loading at P26-100, with a prevalence for coupled cells of 33%. *Abbreviations: IHC, inner hair cell.*

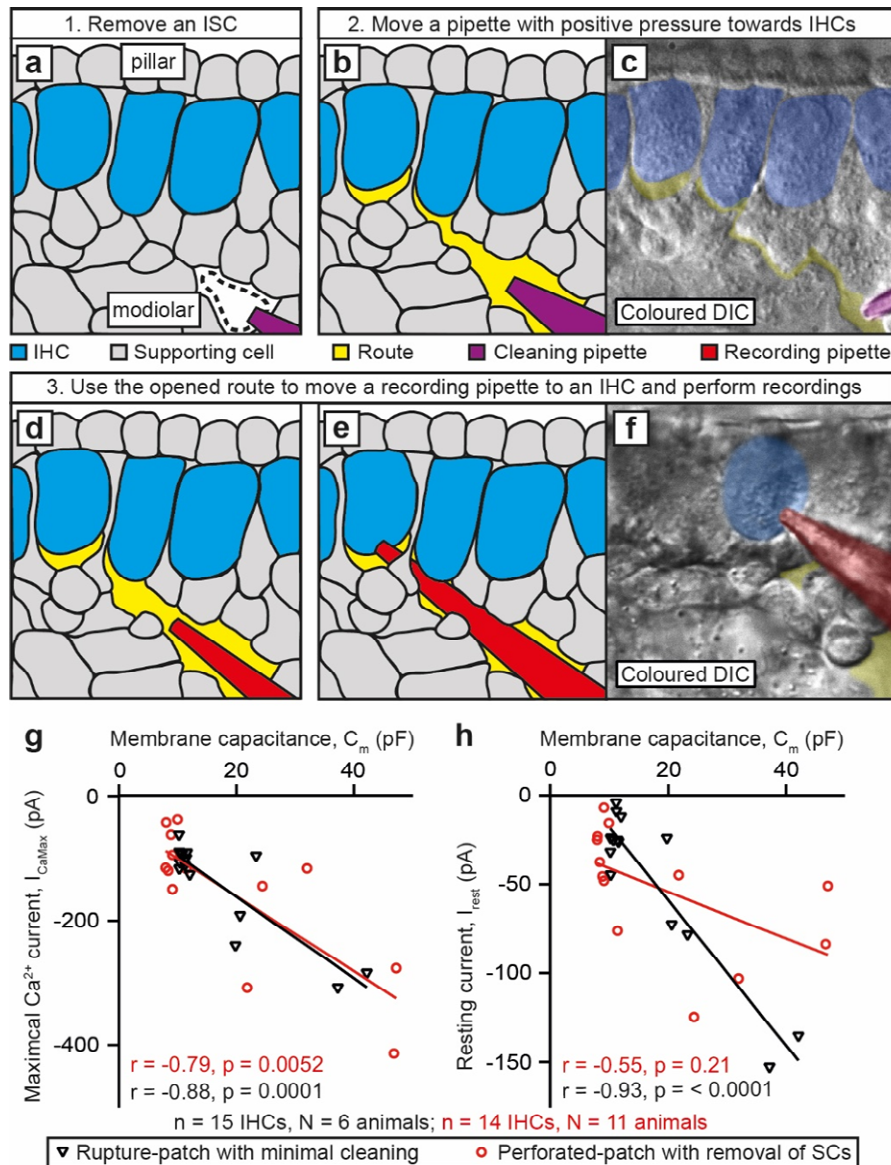

**Supplementary figure 4. IHC coupling can be observed with least invasive recording approaches.** Figures **a-f** illustrate the ruptured-patch of IHCs with minimal cleaning. (**a**) After removing a single inner sulcus cell, (**b**) a cleaning pipette with applied positive pressure is gently moved in between SCs so that a tunnel-like route that reaches IHCs is formed. (**c**) Coloured DIC image of a formed route. (**d-e**) By carefully moving a recording pipette through the route to an IHC, ruptured-patch recordings can be performed. (**f**) Coloured DIC image of a successful ruptured-patch. (**g-h**) In addition to typical IHCs with membrane capacitance ( $C_m$ )  $\sim 9$  pF, IHCs with atypically high  $\text{Ca}^{2+}$  currents ( $I_{\text{CaMax}}$  in **g**), resting membrane currents ( $I_{\text{rest}}$  in **h**), and  $C_m$  can be observed in ruptured-patch recordings with minimal cleaning (black triangle,  $n = 5$  out of 15 IHCs;  $N_{\text{animals}} = 6$ , P16-P24) and with perforated-patch recordings with removal of SCs (red circle,  $n = 5$  out of 14 IHCs,  $N_{\text{animals}} = 11$ , P15-P36). Linear fits are displayed (Pearson correlation coefficient for ruptured-patch with minimal cleaning:  $I_{\text{CaMax}}$ :  $r = -0.88$ ,  $p = 0.0001$ ,  $I_{\text{rest}}$ :  $r = -0.93$ ,  $p < 0.0001$ ; for perforated-patch with minimal cleaning:  $I_{\text{CaMax}}$ :  $r = -0.79$ ,  $p = 0.0052$ ,  $I_{\text{rest}}$ :  $r = -0.55$ ,  $p < 0.21$ ). *Abbreviations:* DIC, differential interference contrast, IHC, inner hair cell; ISC, inner sulcus cell; SC, supporting cell.

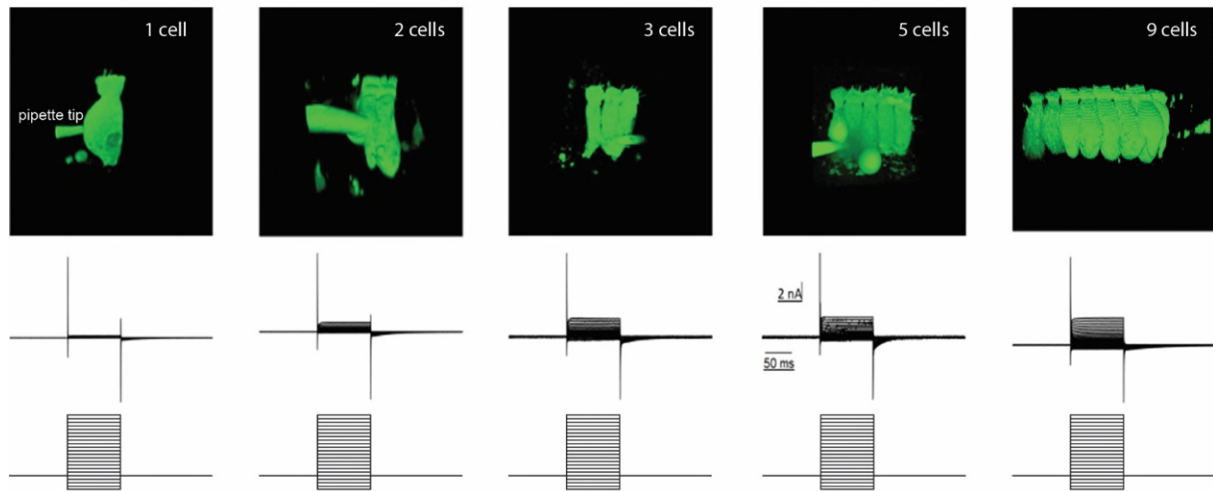

**Supplementary figure 5. Cesium outward currents increase with the number of dye-coupled IHCs.** Analyzing dye and electrical IHC coupling in temporal bone preparation, using 2PLSM imaging of OGB5N-loaded IHCs (top panel) and IHC recordings of  $\text{Cs}^+$ -mediated outward currents (middle panel) in response to 100 ms long depolarizations (in 10 mV increments, bottom panel) from a holding potential of -60 mV. As shown for a sample of  $n = 56$  distinct experiments and quantified in Fig. S6, the maximal  $\text{Cs}^+$  current increases with the number of dye-filled IHCs, indicating a partial summation over the currents of the coupled IHCs. We note that the recordings underestimate the true currents due to voltage drops over the series resistance to the patched IHC and the junctional resistance among the coupled cells.

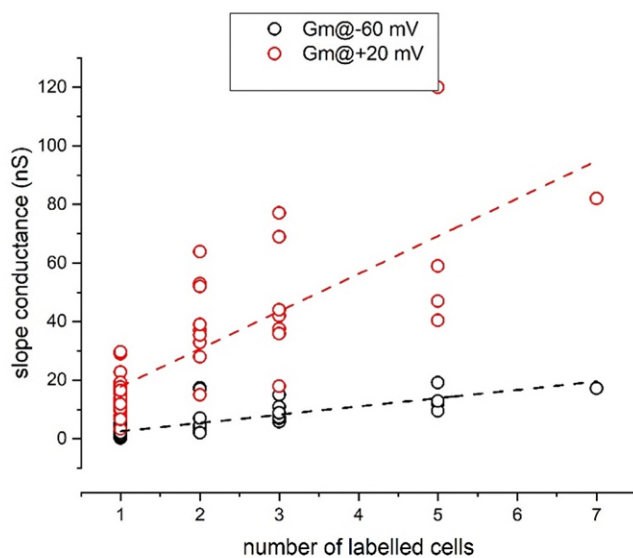

**Supplementary figure 6. IHC membrane conductances increase with the number of dye-coupled IHCs.** Membrane slope conductances ( $G_m$ ) at the holding potential -60 mV and at +20 mV from I-Vs for positively identified uncoupled and coupled cells. All the data was collected within 60 s of whole cell break-in with  $\text{Cs}^+$  as the major pipette cation. The membrane slope conductance at -60 mV, increasing with the number of coupled cells, is a good estimator of the effect of coupling. In this sample, using internal  $\text{Cs}^+$ ,  $G_m = 2.05 \pm 1.25$  nS (mean  $\pm$  SD,  $n = 25$  uncoupled cells) at -60 mV. Preliminary data using  $\text{K}^+$  as the major pipette cation did not permit the sufficient voltage-clamp control to estimate  $G_m$  at +20 mV. Dashed lines show regression fits, with slopes significantly

different from 0 nS/#cell (Pearson correlation coefficient:  $r = -0.78$  @  $-60\text{mV}$  and  $-0.77$  @  $+20\text{mV}$ ,  $p < 0.05$ ).

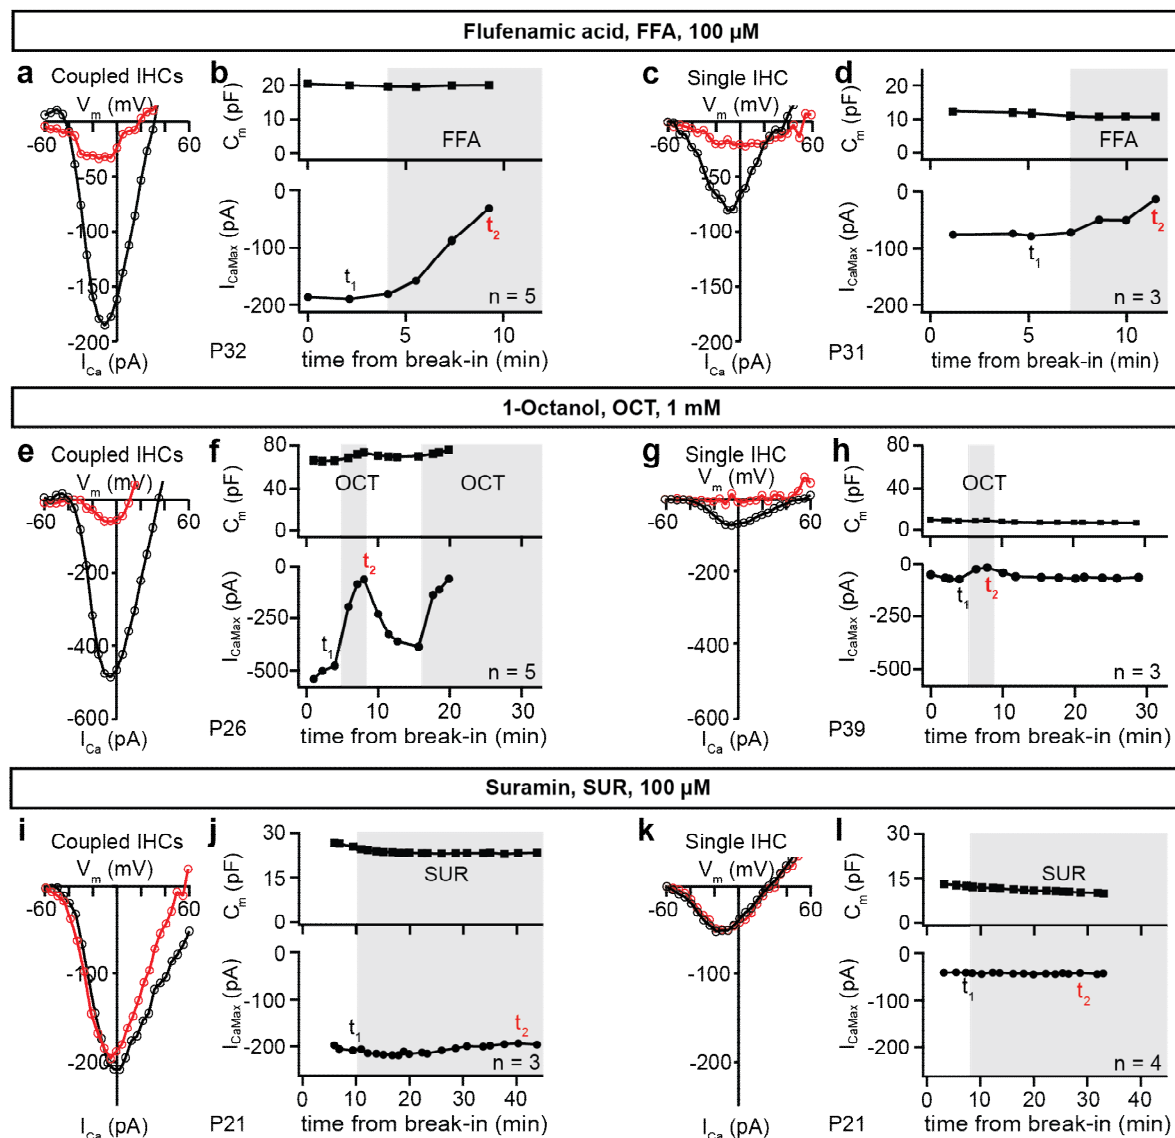

**Supplementary figure 7. Electrical IHC-coupling is not prevented by GJ blockers and suramin.**  $\text{Ca}^{2+}$ -current voltage (IV) curves (a, c, e, g, I, k) were obtained by depolarizing IHCs from the holding voltage ( $-60\text{mV}$ ) with  $5\text{mV}$  steps before and during bath application of blockers. The presence of the blockers is marked with gray in the membrane capacitance ( $C_m$ )-time and maximal  $I_{Ca}$  ( $I_{CaMax}$ )-time plots (b, d, f, h, j, l). The recording time points of the presented IV curves are marked with  $t_1$  (for black curve) and  $t_2$  (for red curve) in the  $I_{CaMax}$ -time plots. The experiments were stopped when the patched IHC was lost. **(a-h)** FFA (a, b) and OCT (e, f) inhibit  $I_{Ca}$  of coupled IHCs without changing  $C_m$ , as seen in these representative experiments. As similar results were obtained with uncoupled IHCs (c, d, g, h), the observed reduction of  $I_{Ca}$  is not due to inhibition of IHC-coupling, but potentially due to the blockade of IHC  $\text{Ca}^{2+}$  channels. **(i-l)** As can be seen from the  $I_{Ca}$ - $V_m$  curves,  $C_m$ -time, and  $I_{CaMax}$ -time plots of representative experiments, suramin does not have an obvious effect on  $C_m$  or  $I_{CaMax}$  of coupled (i, j) and single IHCs (k, l). *Abbreviations: IHC, inner hair cell, FFA, flufenamic acid; OCT, 1-octanol, SUR, suramin.*

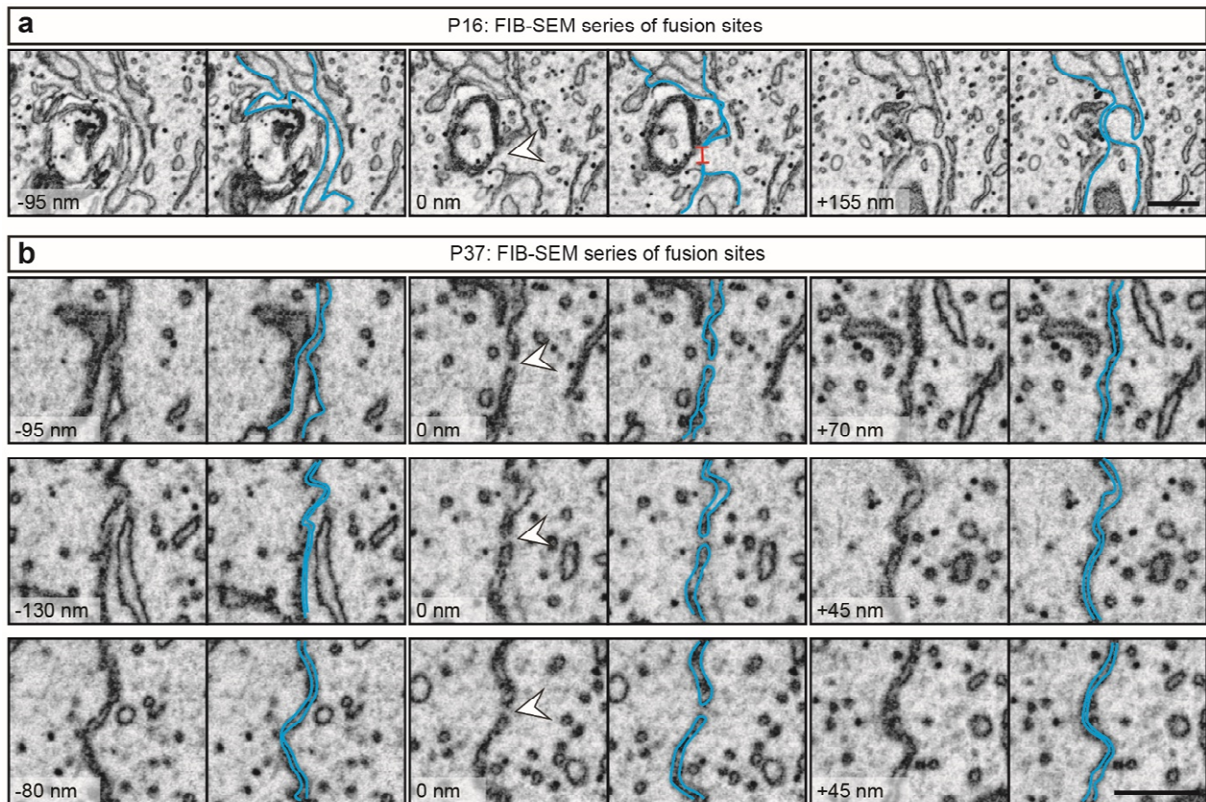

**Supplementary figure 8. FIB-SEM datasets containing putative fusion sites.** Depicted are series of putative IHC fusion sites occurring in P16 (**a**) and P37 (**b**) IHCs. Single FIB-SEM micrographs show the opposing IHC membranes (highlighted in blue) forming contacts (P16, from a filopodium; P37, from flat contacts) that contain IHC fusion sites (white arrowheads).  $n$  FIB-SEM run (P34/37) = 3,  $N_{\text{animal}} = 2$ ;  $n$  FIB-SEM run (P15/16) = 3,  $N_{\text{animal}} = 2$ . For each age group 2 independent embeddings were performed. *Abbreviations:* IHC, inner hair cell. *Scale bar* = 500 nm.

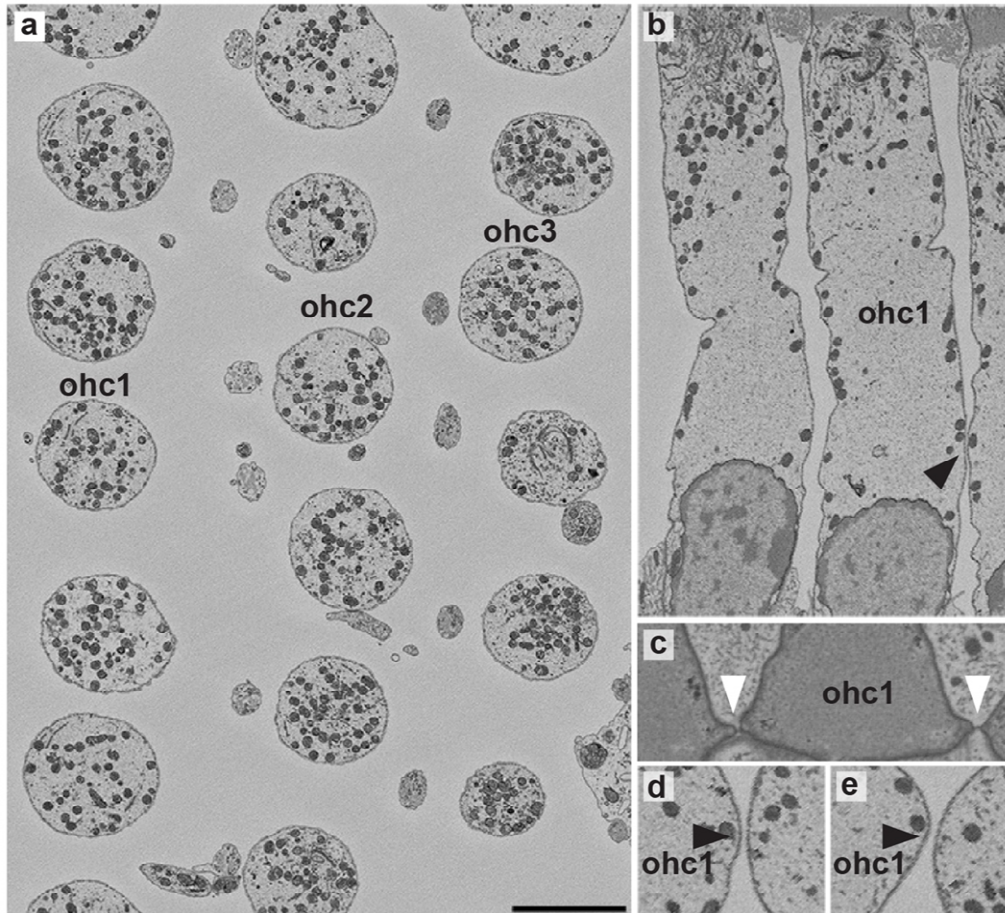

**Supplementary figure 9. No direct contacts between P22 OHCs.** (a-b) Oblique slices through a serial block-face electron microscopic dataset show only rare occasions of closely apposed basolateral membranes of OHCs (black arrowhead). (c) OHCs of the first row are closely apposed near their apical junctions and (d,e) occasionally at their basolateral membranes (black arrowheads). No direct OHC-OHC contacts were observed in two independent datasets. *Abbreviations:* OHC, outer hair cell. *Scale bar* (depicted in a) = 5  $\mu\text{m}$  in a,b; 3.3  $\mu\text{m}$  in c; 2.6  $\mu\text{m}$  in d,e.



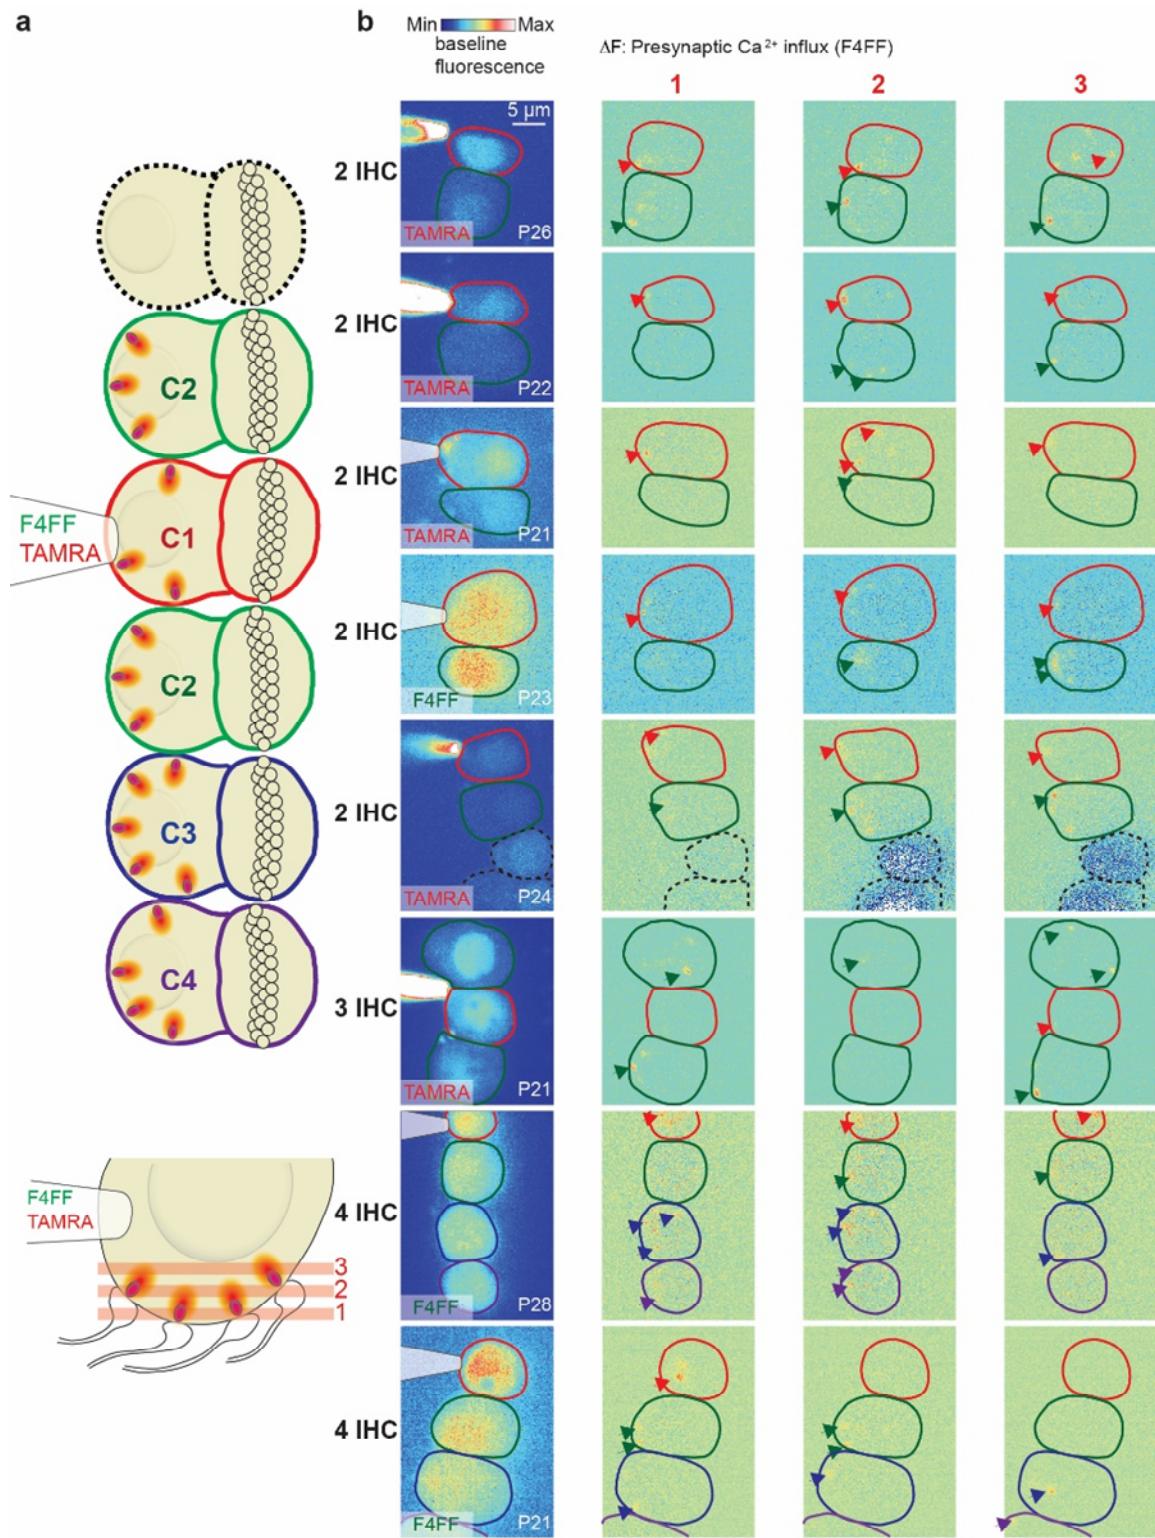

**Supplementary figure 10. Collective synaptic activity in IHC mini-synctia.**

**a)** Coupled IHCs (delineated in color) were patch-clamped and loaded with the calcium indicator Fluo-4FF (F4FF) and the TAMRA-fluorescent CtBP2-binding peptide. C1 (red) is the patched IHC, C2 (green) are coupled IHCs neighbouring C1, C3 (blue) is coupled to C2 and C4 (violet). Red lines show the imaging planes at bottom (1), middle (2) and top sections (3) of the synaptic IHC pole. **(b)** Left column: basal fluorescence indicating the cells in either the red (TAMRA peptide) or green (F4FF) channels. The pipette was drawn in the case it was not in the imaging plane. Right columns:  $\Delta F/F_0$  images from single planes showing localized  $Ca^{2+}$  signals (arrowheads) in the coupled IHCs. Non-coupled IHCs that have been previously patched are delineated in dashed lines.

## Supplementary Note 1

Encoding of auditory signals at IHC-SGN synapses entails 1) mechano-electrical transduction at the tips of the stereocilia generating the receptor potential and 2) the coupling of the receptor potential to glutamate release (stimulus-secretion-coupling) at the ribbon synapses. Both processes involve relatively small numbers of signaling proteins: around 40 mechanotransducer channels per hair cell (13) and around 10 release sites per synapse (14). So, although neighboring IHCs receive virtually identical mechanical stimuli, because basilar membrane tuning is much wider than an IHC (see Supplementary Text 2), each IHC is subject to different realizations of stochastic mechanotransduction currents and hence they show different membrane voltage trajectories. As a consequence, signal encoding precision will be limited by the count statistics of the stochastically operating elements. The low-conductance electric coupling between the IHCs in a mini-syncytium causes voltage averaging, which increases the signal to noise ratio. This can be shown by computational modeling two scenarios in the Neuron simulation environment (15), three non-coupled IHCs (Fig. 8, left panel) and a mini-syncytium of three IHCs (Fig. 8, right panel), during weak stimulation driving the opening of on average 2.7 of the 40 mechanotransducer channels in an IHC (Fig. 8). Note how weakly the mechanotransducer activity is correlated and how correlations downstream of mechanotransduction are increased by IHC-coupling.  $\text{Ca}^{2+}$  channel gating seems more representative of the input in coupled than in non-coupled IHCs, demonstrated by the tendency toward higher correlation between mechanical input and  $\text{Ca}^{2+}$  channel open probability (Pearson correlation coefficient: 0.88 for coupled IHCs vs. 0.82 for non-coupled IHCs).

A simple estimation shows how coupling improves the signal to noise ratio. Assuming unmodulated weak input, the number of open mechanotransducer channels would fluctuate around an average value, e.g. four out of the 40 per IHC. At any time, the actual number of open channels is random, following a binomial distribution  $\mathcal{B}(N = 40, p = 0.1)$  with a standard deviation of  $SD = \sqrt{N \cdot p \cdot (1 - p)} = 1.90$ . In the extreme case of three completely fused cells, a common membrane voltage would be controlled by all 120 mechanotransduction channels. The open channel count would follow  $\mathcal{B}(N = 120, p = 0.1)$ , with 12 channels open on average and an SD of 3.29. Due to the coupling, the total number of mechanotransducer channels controlling the syncytium's membrane

voltage becomes less noisy, the ratio between standard deviation and average drops from 0.47 to 0.27. The improved signal to noise ratio carries over to the fluctuations in the membrane voltage, and  $\text{Ca}^{2+}$  channel opening. Therefore, the timing of vesicle release would be more synchronized across the synapses of three coupled IHCs as compared to synapses of neighboring but non-coupled IHCs. We determined the magnitude of this effect by simulation of mechanotransduction and  $\text{Ca}^{2+}$  channel gating in non-coupled and coupled IHCs using stochastic ion channel models in the Neuron simulation environment (all code is published on the Neuron database).

### **Model layout**

The simulation comprises of several IHCs, which are either isolated from each other or coupled by fusion sites. The passive properties of the IHC and the connections follow standard properties: the specific membrane capacitance,  $c_m = 10 \text{ fF}/\mu\text{m}^2$ ; intracellular resistivity  $r_i = 120 \text{ Ohm}\cdot\text{cm}$  and the specific membrane resistance,  $r_m = 250 \text{ Ohm}\cdot\text{cm}^2$  of the IHCs is chosen to obtain an effective membrane time constant of  $250 \mu\text{s}$  (*16*). This basal conductance subsumes all channels that are open at rest. IHC-IHC fusion sites are approximated by 100 nm long, 78 nm wide tubes. This size is chosen to approximate a junctional resistance,  $R_j$  of 25 M $\Omega$ . For the numerical simulations, a cell is represented by 11 segments, a joint by 3 segments. Joints on different sides of an IHC are longitudinally offset so that they do not connect to the same segment. Stochastic gating of mechanotransducer channels and  $\text{Ca}_v1.3$  voltage dependent  $\text{Ca}^{2+}$  channels, are simulated with a variant of the Gillespie-Algorithm (*17*) that was adapted to work with the fixed time step of neuron simulations. To obtain statistics over many realizations of the  $\text{Ca}_v1.3$  gating, a two-step process is used. During the first run, the mechanotransducer channels are driven by the mechanical stimulus and gate stochastically. The number of open mechanotransducer channels is recorded at every time step. During the next thousands of runs, those open channel counts are played back while the gating of  $\text{Ca}_v1.3$  follows independent stochastic realizations. The output of these simulations, i.e.  $\text{Ca}_v1.3$  open events, are further processed to obtain release events and AP times, as described below.

## Mechanotransducer channels and voltage-gated $\text{Ca}^{2+}$ channels

Forty mechanotransducer channels mediate mechanosensitive influx of cations (mostly potassium) at the top end of each cell. They are driven by an external sinusoidal stimulus representing mechanical displacement in units of nanometers. A mechanotransducer channel has two states (O, C), the speed and mechano-dependence of the transition are chosen to obtain properties as described in experimental studies (13, 18), i.e. sub-millisecond opening and closing transitions and an open probability that increases sigmoidally with the displacement  $d$ . The range of displacement for which the open probability changes, is over-estimated in experiments using glass probes and it is under-estimated when using the fluid jet to stimulate (13). Therefore, the value used here lies in between those experimental estimates. The opening and closing rates in  $\text{ms}^{-1}$  are  $k_+ = k_{max} / \left(1 + \exp\left(\frac{(s_{1/2}^o - d)}{k_o}\right)\right)$ ;  $k_- = k_{max} / \left(1 + \exp\left(\frac{(d - s_{1/2}^c)}{k_c}\right)\right)$  given a displacement  $d$ . The parameters are  $k_{max} = 16.9 \text{ ms}^{-1}$ ;  $s_{1/2}^o = 179 \text{ nm}$ ;  $s_{1/2}^c = -10 \text{ nm}$ ;  $k_o = 50.6 \text{ nm}^{-1}$ ;  $k_c = 51.4 \text{ nm}^{-1}$ . Rates and open probability are visualized in Fig. S11 We aimed to use a realistic model that closely reproduces experimental results, even though the exact details of the mechanotransducer model are in no way crucial to the outcome of the simulation. The key aspect, the stochasticity of the voltage trajectory of individual cells, results from two main determinants: the low overall number of mechanotransducer channels and their sub-millisecond gating kinetics. Both parameters are experimentally documented in multiple studies.

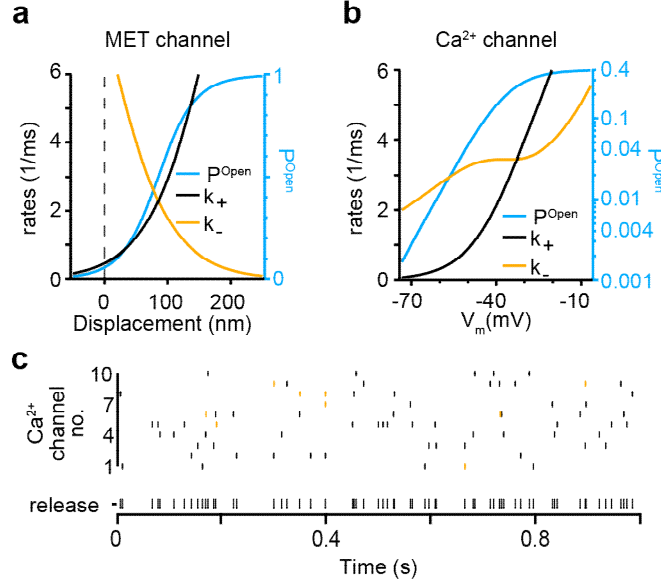

**Supplementary figure 11: Implementation of ion channels and release event pruning.** (a) The model for mechanotransducer channels is designed to account for published experimental result. (b)  $\text{Ca}_v1.3$  channels are implemented as described earlier (19), for details see text. (c) Approximate times of release events were determined by long  $\text{Ca}_v1.3$  channel openings (600  $\mu\text{s}$  and longer), for which  $\text{Ca}^{2+}$  influx is expected to be sufficient to trigger release in the  $\text{Ca}^{2+}$  nanodomain-like scenario (19). The top ten rows show time stamps at which an opening of the respective channel (#1 to 10) exceeded a duration of 600  $\mu\text{s}$ . All ten channels are from the same cell, this is, all experienced the same voltage time course. Note that only a small fraction of openings (3%) last longer than this the 600  $\mu\text{s}$  cut-off. When all events from the ten channels are combined to approximate release events and then postsynaptic action potentials at the IHC ribbon synapse, nine out of 71 events are pruned (orange) when post-synaptic refractoriness is considered. The postsynaptic spike rate for this weak stimulus is on average 64 action potentials/s.

The  $\text{Ca}_v1.3$   $\text{Ca}^{2+}$  channel gating parameters are obtained from experiments (19–21), derived as described before. In short, the channel has two closed and one open state with the following transitions:

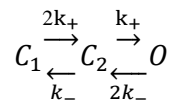

with opening and closing rates in  $\text{ms}^{-1}$ :

$$k_+ = \frac{\exp(-b \cdot V)}{a} \sqrt{p_{\max} / \left(1 + \exp\left(\frac{(V_{1/2} - V)}{w}\right)\right)} ; k_- = \frac{\exp(-b \cdot V)}{a} - k_+$$

with  $a = 0.2565/3^{(T-23^\circ\text{C})/10\text{K}}$  ms;  $b = -0.0295 \text{ mV}^{-1}$ ;  $p_{\max} = 0.4$ ;  $V_{1/2} = -36.2 \text{ mV}$  ;  $w = 6.8 \text{ mV}$ ;  $T = 37^\circ\text{C}$ . Rates and open probability are visualized in Fig. S11b).

## Stimulus-secretion coupling

$\text{Ca}^{2+}$  enters through open  $\text{Ca}^{2+}$  channels and binds to the fusion machinery of a nearby release-competent synaptic vesicle (SV), triggering its fusion. In mature IHCs, this stimulus-secretion coupling operates mostly in the  $\text{Ca}^{2+}$  nanodomain-like regime (19, 22, 23), i.e. the opening of one or very few  $\text{Ca}^{2+}$  channels controls the fusion of a given vesicle. These processes are not explicitly modelled. Instead, we use the functional properties of  $\text{Ca}^{2+}$  nanodomain signaling and approximate the occurrence of release events with the occurrence of long  $\text{Ca}^{2+}$  channel openings. Channel open times beyond a certain cut-off time are considered effective to trigger fusion of the nearby vesicle. The exact duration of this cut-off had no influence on the outcome. This was established using cut-off values between 100 microseconds and 800 microseconds. For cut-offs beyond 800 microseconds the collection of a sufficient number of events was beyond the available processor time. The results below are derived with a cut-off of 600 microseconds.

We previously estimated the number of independent vesicle release sites per IHC ribbon synapse to be around 10, based on electron microscopy studies and quantitative analysis of release rate dynamics in response to sound stimulation (4, 14). Therefore, 10  $\text{Ca}^{2+}$ -channels were considered to simulate the 10  $\text{Ca}^{2+}$  channel-release units of a synapse. Release events occurring at any of those 10 units were considered as inputs to a single postsynaptic SGN. In mammals, most SGNs receive input from only one ribbon synapse. Release events occurring in close succession were pruned by a refractory process with an absolute refractory period of 0.6 ms and a relative refractory period of 0.65 ms as we used earlier (24, 25), based on our experimental estimates (26). In this way, 10 independent trials of single  $\text{Ca}_v1.3$  channels yield one realization of an action potential sequence from a synapse (Fig. S11c). In order to obtain not only a single realization, but rather an approximation of the instantaneous rate of action potentials under the given realization of mechanotransduction, we simulated 35,000 trials equaling to 3,500 synapses (Fig. 8g).

For all simulations in this study, we restrict ourselves to weak stimuli, i.e. causing low release rates. Therefore, the release sites are rarely depleted and the dynamics of release site refilling is of little influence. Hence, to simplify the model, we ignored the time required to refill the release site. We feel

this is further justified, because the improved signal to noise in the syncytium is driven by averaging of the mechanotransducer currents, i.e. events upstream of vesicle release.

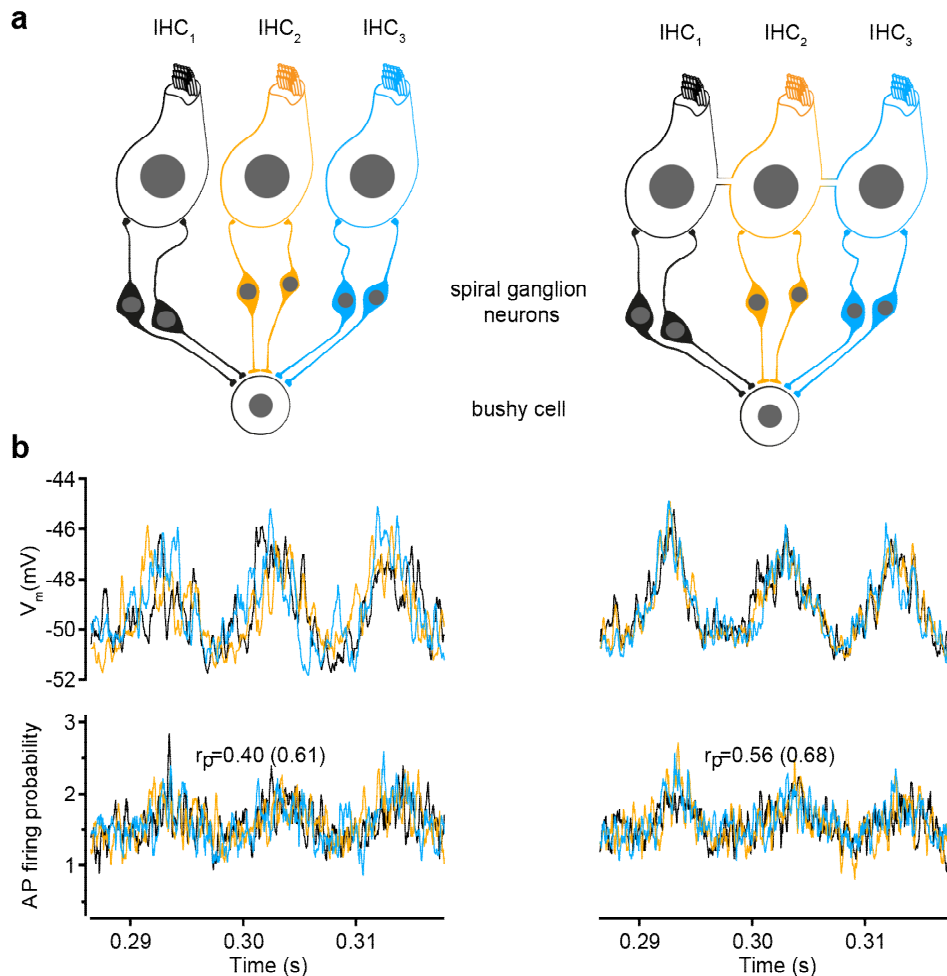

**Supplementary figure 12: Coupling of three IHCs increases the correlations between action potential firing by SGNs.** (b) In the first configuration of the model, six SGNs relay auditory information from three IHCs to a bushy cell, which fires only if sufficiently coincident input arrives from the SGNs. (b) A short section of membrane voltage and action potential frequency (average event rate within 200  $\mu$ s, across 4,500 synapses) are shown for uncoupled (left) and coupled IHCs with a junctional resistance of 15 MOhm (right) - compare to the dataset for 25 MOhm in Fig. 8. Note how the coupling improves correlations between the action potential rate for SGNs originating at neighboring IHCs as well as the correlation between the mechanical stimulus and the action potential rate (in parentheses).

In summary, our model includes a deterministic sinusoidal stimulus that controls stochastic mechano-transducer channels. The resulting current drives excursions of the membrane voltage, which in turn controls  $\text{Ca}^{2+}$  channel gating and long single  $\text{Ca}^{2+}$  channel openings are considered to trigger release events. Pruned by refractoriness, release events translate to action potentials in spiral ganglion neurons. The simulation shows that coupling through 25 MOhm junctions strongly increases the

correlations between the auditory input and the voltage in the coupled IHCs and also the correlations the release events (Fig. 8).

### **Coincidence detection**

Although the functional benefit of coupling is clear from the increased correlation between IHC input and SGN output, we wanted to take the analysis a step further in the auditory pathway. In the cochlear nucleus multiple SGNs contact each bushy cell, which only fires, if a sufficient number of fibers is firing coincidentally within a narrow time window. For example, bushy cells in the anteroventral cochlear nucleus fire an action potential, when a number of SGNs fire action potentials within a short coincidence window and, as a result, show improved precision of spike timing when compared to the spiral ganglion neurons (27, 28). Each bushy cells receive multiple inputs of SGNs with similar characteristic frequency and spontaneous firing rate (29), which allows us to use one parameter set to simulate such a set of incoming action potential times. The number of coincidences required depends on the bushy cell type and species. It is considered to range from a few fibres up to 20 or even more. The coincidence window has no fixed width, it depends on the activity status, i.e. the depolarization history of the bushy cell (30). Typical bushy cell membrane time constants and spike jitter (28) suggest coincidence window times of 50 to 200  $\mu$ s. We find that different assumptions about this coincidence window had no impact on the outcome of the model (as described below) at the cochlear nucleus (CN) because the bandwidth of signals from the IHC is already restricted by the IHC membrane time constant and the rise time of the  $Ca^{2+}$  currents.

The probability of two coincident action potentials from two SGNs within a 200  $\mu$ s coincidence window simply corresponds to the product of the individual firing probabilities (Fig. S12). The average value of this product depends on the origin of the signals of the SGNs. If they received input from two synapses of the same IHC, coincidences are slightly more likely. To our knowledge, there is no information yet about the precise connectivity between IHCs and bushy cells. We studied two different configurations in which six SGNs converge onto a bushy cell, where the coincidences are detected. In the first configuration, three IHCs provide two SGN inputs each. In the second configuration, each of the six SGNs originates at a different IHC. In each case, we studied two



possibilities: either all three/six IHCs are non-coupled or all three/six IHCs are coupled with each other.

For relatively weak stimuli (25 nm deflections), which one could consider close to threshold, we find typically that IHC coupling causes a subtle increase of around 2% in the coincidence rate for the three IHCs configuration and of 3% for the six IHC configuration. Interestingly, at very small mechanical stimuli, 2 nm sinusoidal deflection, when the correlation between the stimulus and the mechanotransducer signal drops below 0.06, the coupling between IHC does not cause an increase, but rather a small (1%) decrease in the coincidence rate. When the mechanotransducer channels open mostly unrelated to the stimulus, the averaging across coupled IHCs reduces the impact of the spurious channel openings on the coincidence rate. Together, the slight reduction at subthreshold stimuli and the slight increase at weak, supra-threshold inputs, serves to suppress thermal noise of the mechanotransduction by a slight increase of the detection threshold, i.e. the stimulus intensity, at which the coincidence rate crosses a certain threshold. This small effect size of a few percent, resulting from our simulations, is not unexpected given the identical mechanical input to the neighboring IHCs. It can be expected to increase, if basolateral  $K^+$  channels were added to the simulation of IHC conductances. These adaptation currents would provide a high-pass filter that reduces the average voltage and thereby increases the ratio between voltage modulation and signal average. The simulations presented here are kept deliberately simple to illustrate the essence of the coupling effect: a reduction in the noise contributions from the limited number of mechanotransducer channels.

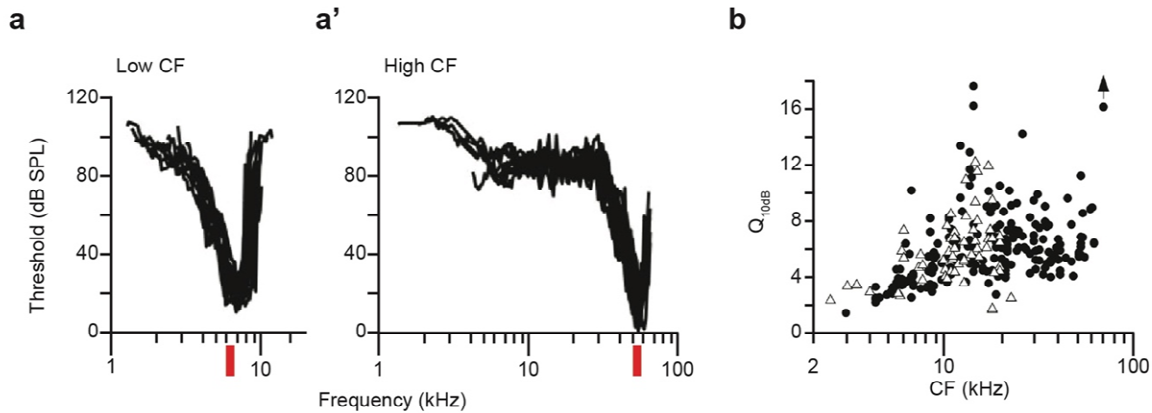

**Supplementary figure 13. Frequency resolution of sound coding by auditory nerve fibers.** (a-a') Tuning curves of high spontaneous, low threshold auditory nerve fibers recorded from CBA/J mice taken from (31) and modified: **a**, auditory nerve fibers with relatively low characteristic frequency (CF) of around 7 kHz; **a'**, auditory nerve fibers with relatively high characteristic frequency (CF) of around 50-60 kHz. Red boxes indicate the frequency range covered by the largest observed mini-syncytium (9 IHCs: 83.7  $\mu$ m, approximately 1.29% of the length of the organ of Corti or 0.06 octaves). **(b)** Quality of frequency tuning assessed as  $Q_{10dB}$  (see below) of auditory nerve fibers recorded from CBA/J (circles) and C57Bl/6 (triangles) mice taken (31).

## Supplementary note 2

### Does IHC-coupling degrade the frequency resolution of cochlear sound coding?

IHC coupling with large-conductance intercellular coupling would be expected to degrade frequency resolution of sound coding if it was not limited to within the mini-syncytia that are embedded in the row of IHCs of which most (70%) are non-coupled. In our data set on P30-45 mice, the average number of cells per syncytium was 3 ( $3.05 \pm 0.17$  (S.D. = 1.53)). The mouse cochlea (with differences between strains and methods) is approximately 6-7 mm long (32–34), covers approximately 5 octaves (35) and contains 660-760 IHCs (32, 33), each of them approximately 9  $\mu$ m in diameter. Here, assuming the above parameters being 6.5 mm, 5 octaves and 700 IHCs (i.e. 9.3  $\mu$ m per IHC) we calculate that the average mini-syncytium (27.9  $\mu$ m) covers 0.43% of the length or 0.02 octaves. In the most extreme case observed, i.e. the largest block (9 IHCs, 83.7  $\mu$ m) would cover approximately 1.29% of the length or 0.06 octaves.

Next, we compared those estimates to the physiological estimates of frequency resolution at the level of the basilar membrane and auditory nerve fibers. For the basilar membrane, the  $Q_{10dB}$  (characteristic frequency of basilar membrane displacement at threshold, i.e. the frequency for which the least sound pressure is required to elicit the displacement, divided by the bandwidth at 10 dB above threshold) amounts to  $8.7 \pm 4.3$  in the high frequency range of the cochlea of CBA/J mice (50-56 kHz,

(36)). This reflects a bandwidth at the level of the basilar membrane of approximately 5.75 kHz at 50 kHz or 0.17 octaves, approximately 3-times larger than the frequency range that is represented by the largest observed syncytium (0.06 octaves).

The quality of frequency tuning of auditory nerve fibers quantified as Q10dB (ratio of the characteristic frequency at threshold, i.e. the frequency for which the least sound pressure is required to increase the firing rate, and the frequency bandwidth of the tuning curve 10 dB above threshold) typically varies between 2 and 12 in the mouse cochlea (26, 31), Fig. S13). In the characteristic frequency range from 8 kHz to 16 kHz, for which we directly demonstrated IHC-coupling in young C57Bl/6J mice, the average Q10 dB was approximately 4 (26, 31) Fig. S13). For 12 kHz this reflects a bandwidth at the level of the nerve of 3000 Hz, or 0.37 octave approximately 6-times larger than represented by the broadest observed syncytium (0.06 octaves).

For a comparison to psychophysical estimates of frequency resolution, we relied on human data (37) which states that humans can discriminate down to 7 cents of a musical semitone (cent: percentage of a semitone). We also used a model of the human cochlea (38) with a cochlear length of 33 mm containing 3500 IHCs of approximately 9  $\mu\text{m}$  per IHC. The mid-cochlear quarter of a turn (263-407 Hz) should then hold approximately 245 IHCs. Making a linear approximation of the frequency distribution within the mid-cochlear quarter of a turn we calculated that there are approximately 30 IHCs per a musical semitone (ST). This means each IHC “would cover” approximately 3 cents on the tonotopic map. Now, let us assume a similar situation of IHC coupling for the human cochlea as we observed experimentally in the mouse cochlea. Then, even for the case that the entire cochlea was tiled by mini-syncytia of the average size of 3 IHCs reported here, this would indicate a best possible frequency resolution of 9 cents, which is close to the lowest psychophysical estimates (7 cent, (37)). Therefore, we conclude that low prevalence and small size of mini-syncytia avoids trading off frequency resolution against detection sensitivity.

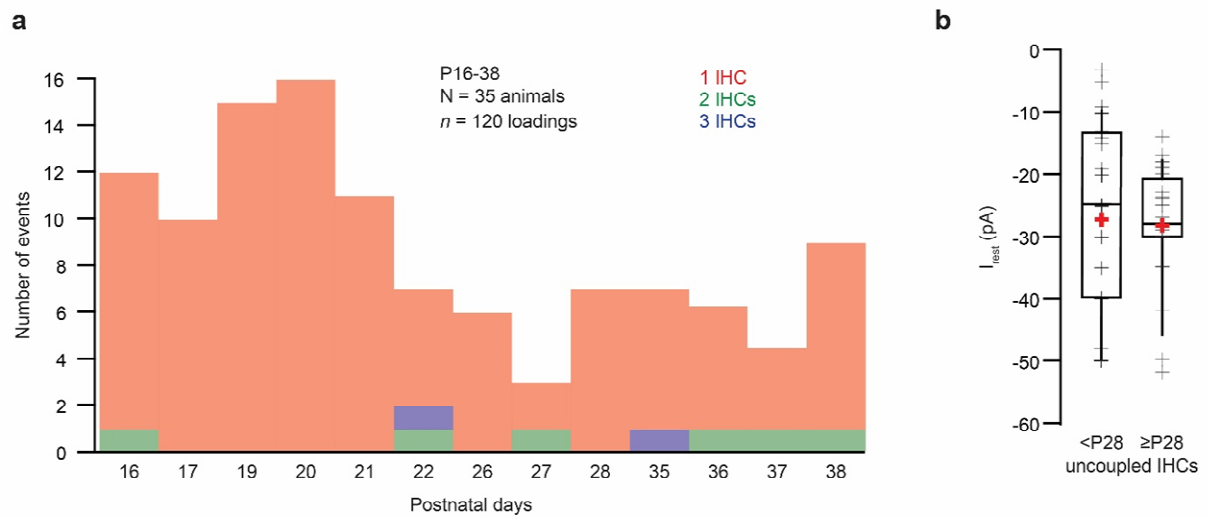

**Supplementary figure 14: Coupling probability and resting currents as a function of age in gerbils.**

**(a)** Distribution of the number of IHCs labelled during a dye-loading experiment as a function of age.  
**(b)**  $I_{rest}$  of un(non)-coupled IHCs before 28 and from P28 was not statistically different (<P28:  $-26.79 \pm 2.32$  pA,  $n = 39$ ,  $N = 15$ ;  $\geq$ P28:  $-28.16 \pm 1.96$  pA,  $n = 24$ ,  $N = 9$ , Mann-Whitney-Wilcoxon test,  $p = 0.47$ )

| Age group                        | Membrane contacts/ Fusion sites                                                                                                                                                                                                                                                                                                                                                                                                   | Section                                                                                                                        | Contact range in z (brackets: in xy in fusion sites)                                         |
|----------------------------------|-----------------------------------------------------------------------------------------------------------------------------------------------------------------------------------------------------------------------------------------------------------------------------------------------------------------------------------------------------------------------------------------------------------------------------------|--------------------------------------------------------------------------------------------------------------------------------|----------------------------------------------------------------------------------------------|
| P15<br>(FIB-run #1,<br>animal 1) | 1. Flat contact IHC 1 with IHC 2<br>2. Filopodial contact IHC 1 with IHC 2<br>3. Filopodial contact IHC 1 with IHC 2<br>4. Filopodial contact IHC 1 with IHC 2<br>5. Filopodial contact IHC 1 with IHC 2<br>6. Filopodial contact IHC 1 with IHC 2                                                                                                                                                                                | 571-580<br>929-934<br>1778-1796<br>1781-1792<br>1955-1994<br>1973-1981                                                         | 45 nm<br>25 nm<br>90 nm<br>55 nm<br>195 nm<br>40 nm                                          |
|                                  | 1. Flat contact IHC 2 with IHC 3<br>2. Filopodial contact IHC 2 with IHC 3<br>3. Filopodial contact IHC 2 with IHC 3<br>4. Filopodial contact IHC 2 with IHC 3                                                                                                                                                                                                                                                                    | 1549-1556<br>1620-1726<br>1813-1846<br>2024-2028                                                                               | 35 nm<br>530 nm<br>165 nm<br>20 nm                                                           |
| P15<br>(FIB-run #2,<br>animal 1) | 1. Filopodial contact IHC 1 with IHC 2<br>2. Filopodial contact IHC 1 with IHC 2<br>3. Filopodial contact IHC 1 with IHC 2<br>4. Filopodial contact IHC 1 with IHC 2<br>5. Filopodial contact IHC 1 with IHC 2<br>6. Filopodial contact IHC 1 with IHC 2<br>7. Filopodial contact IHC 1 with IHC 2<br>8. Filopodial contact IHC 1 with IHC 2<br>9. Filopodial contact IHC 1 with IHC 2<br>10. Filopodial contact IHC 1 with IHC 2 | 3341-3360<br>3569-3581<br>3412-3454<br>3418-3457<br>3453-3459<br>3569-3580<br>3666-3677<br>3672-3705<br>3730-3747<br>3805-3812 | 95 nm<br>60 nm<br>210 nm<br>195 nm<br>30 nm<br>55 nm<br>55 nm<br>165 nm<br>85 nm<br>35 nm    |
|                                  | 1. Filopodial contact IHC 2 with IHC 3<br>2. Filopodial contact IHC 2 with IHC 3<br>3. Filopodial contact IHC 2 with IHC 3<br>4. Filopodial contact IHC 2 with IHC 3<br>5. Filopodial contact IHC 2 with IHC 3<br>6. Filopodial Contact IHC 2 with IHC 3<br>7. Filopodial contact IHC 2 with IHC 3<br>8. Filopodial contact IHC 2 with IHC 3<br>9. Filopodial contact IHC 2 with IHC 3<br>10. Filopodial contact IHC 2 with IHC 3 | 1073-1088<br>1263-1285<br>1348-1375<br>1383-1407<br>1906-1928<br>1933-1938<br>2060-2148<br>2300-2328<br>2616-2656<br>2688-2696 | 75 nm<br>110 nm<br>135 nm<br>120 nm<br>110 nm<br>25 nm<br>88 nm<br>140 nm<br>200 nm<br>40 nm |
| P16<br>(FIB-run #3,<br>animal 2) | 1. Flat contact IHC 2 with IHC 3<br>2. Fusion site between IHC 2 and IHC 3<br>3. Filopodial contact IHC 2 with IHC 3<br>4. Filopodial contact IHC 2 with IHC 3<br>5. Filopodial contact IHC 2 with IHC 3<br>6. Filopodial contact IHC 2 with IHC 3                                                                                                                                                                                | 17-64<br>738-745<br>1110-1135<br>1245-1260<br>2775-2785<br>2820-2870                                                           | 47 nm<br>35 nm (xy: 135.83 nm)<br>125 nm<br>75 nm<br>50 nm<br>250 nm                         |
| P34<br>(FIB-run #1,<br>animal 1) | 1. Flat contact IHC 1 with IHC 2<br>2. Flat contact IHC 1 with IHC 2                                                                                                                                                                                                                                                                                                                                                              | 1357-1558<br>1615-1726                                                                                                         | 1 $\mu$ m<br>555 nm                                                                          |
|                                  | 1. Flat contact IHC 2 with IHC 3<br>2. Flat contact IHC 2 with IHC 3<br>3. Flat contact IHC 2 with IHC 3<br>4. Flat contact IHC 2 with IHC 3                                                                                                                                                                                                                                                                                      | 11-76<br>453-1687<br>586-634<br>2129-2200                                                                                      | 325 nm<br>6.17 $\mu$ m<br>240 nm<br>355 nm                                                   |
| P34<br>(FIB-run #2,<br>animal 1) | 1. Flat contact IHC 1 with IHC 2<br>2. Flat contact IHC 1 with IHC 2                                                                                                                                                                                                                                                                                                                                                              | 1-766<br>1144-1411                                                                                                             | 3.83 $\mu$ m<br>1.335 $\mu$ m                                                                |

| Age group                              | Membrane contacts/ Fusion sites        | Section              | Contact range in z (brackets: in xy in fusion sites) |
|----------------------------------------|----------------------------------------|----------------------|------------------------------------------------------|
| P34<br>(FIB-run #2,<br>animal 1)       | 3. Fusion site between IHC 1 and IHC 2 | 1233-1340            | 535 nm (xy: 124.81 nm)                               |
|                                        | 1. Flat contact IHC 2 with IHC 3       | 1-1112               | 5.56 $\mu$ m                                         |
|                                        | 2. Fusion site between IHC 2 and IHC 3 | 115-121              | 30 nm ( xy: 101.98 nm)                               |
|                                        | 3. Fusion site between IHC 2 and IHC 3 | 519-526              | 35 nm ( xy: 146.82 nm)                               |
|                                        | 4. Fusion site between IHC 2 and IHC 3 | 1171                 | 5 nm ( xy: 123.69 nm)                                |
|                                        | 5. Filopodial contact IHC 2 with IHC 3 | 1730-1768            | 190 nm                                               |
| P37<br>(FIB-run #3,<br>animal 2)       | 1. Flat contact IHC 1 with IHC 2       | 11-22                | 55 nm                                                |
|                                        | 1. Flat contact IHC 2 with IHC 3       | 12-25                | 65 nm                                                |
|                                        | 2. Filopodial contact IHC 2 with IHC 3 | 234-275              | 205 nm                                               |
|                                        | 3. Flat contact IHC 2 with IHC 3       | 1717-1862            | 725 nm                                               |
|                                        | 1. Flat contact IHC 3 with IHC 4       | 304-314              | 50 nm                                                |
|                                        | 2. Flat contact IHC 3 with IHC 4       | 1445-2128            | 3.42 $\mu$ m                                         |
|                                        | 3. Fusion site between IHC 3 and IHC 4 | 1653-1661            | 40 nm (xy: 30.15 nm)                                 |
|                                        | 4. Fusion site between IHC 3 and IHC 4 | 1706-1709            | 15 nm (xy: 14.42 nm)                                 |
|                                        | 5. Fusion site between IHC 3 and IHC 4 | 1821-1824            | 15 nm (xy: 15.23 nm)                                 |
| 6. Fusion site between IHC 3 and IHC 4 | 2233-2244                              | 55 nm (xy: 52.80 nm) |                                                      |

**Table S1. Quantification of contact sites and putative IHC fusion sites in the FIB data.** IHC-IHC membrane contacts are categorized into contact sites via a filopodium touching the neighboring IHC (filopodial contact) and flat membrane contacts. Both contact categories can contain perforations, likely due to the fusion of membranes of two neighboring IHCs (putative IHC fusion sites). In P34/37 IHCs, the flat contacts as well as putative IHC fusion sites are more prevalent than at P15/16 IHCs, when the filopodial contacts prevail (Table 1 for summary). The length of the individual contact sites in z is calculated via the number of sections, each section accounts for 5 nm. The xy length of the syncytial contacts was measured in the section with the largest extend of the perforation in 3dmod. In each dataset, one full IHC was visible in the region of interest, flanked by neighboring IHCs that were only partially visible, but showing the full membrane contact (see also Fig. 5).  $n$  FIB-SEM run (P34/37) = 3,  $N_{\text{animals}} = 2$ ;  $n$  FIB-SEM run (P15/16) = 3,  $N_{\text{animals}} = 2$ . In total, 3 full IHCs with their contacts to neighboring IHCs were analysed per age group. Per age group 2 independent embeddings were performed. Note that 2 FIB-runs from P15 and 1 FIB-run from P34 do not show putative fusion sites.

| Figure                   | Data                                                  | n (replicates) N (animals)                                                           | Statistical test                                           | Significance at 0.05  |
|--------------------------|-------------------------------------------------------|--------------------------------------------------------------------------------------|------------------------------------------------------------|-----------------------|
| Figure 2b,c              | Distribution of number of dye-filled IHCs             | P21-28 (n = 365 loadings, N = 113)<br>P30-45 (n = 155 loadings, N = 59)              | Kolmogorov-Smirnov test                                    | p < 0.00001           |
| Figure 2e                | I <sub>Camax</sub> of 1 IHC vs 3 and 4 IHCs           | 1 IHC (n = 21 recordings, N =9)<br>3 and 4 IHCs (n = 4 recordings, N = 4 , for each) | Dunn-Holland-Wolfe non-parametric multiple comparison test | p < 0.05              |
| Figure 2e                | I <sub>Camax</sub> vs C <sub>m</sub>                  | n = 42 recordings, N = 26                                                            | Pearson correlation coefficient                            | r = -0.66 p < 0.00001 |
| Figure 2e'               | I <sub>rest</sub> of 1 IHC vs 3 and 4 IHCs            | 1 IHC (n = 21 recordings, N =9)<br>3 and 4 IHCs (n = 4 recordings, N = 4 , for each) | Dunn-Holland-Wolfe non-parametric multiple comparison test | p < 0.05              |
| Figure 2e'               | I <sub>rest</sub> vs C <sub>m</sub>                   | n = 42 recordings, N = 26                                                            | Pearson correlation coefficient                            | r = -0.74 p < 0.00001 |
| Figure 7c                | $\Delta_{F_{max}/F_0}$ of C1 vs C2                    | C1: 37 spots in 8 IHCs, N = 8<br>C2: 43 spots in 9 IHCs, N = 8                       | Two-tailed Mann-Whitney-Wilcoxon test                      | p = 0.31              |
| Figure 7c                | V <sub>h</sub> of C1 vs C2                            | C1: 17 spots in 7 IHCs, N = 7<br>C2: 30 spots in 8 IHCs, N = 8                       | Two-tailed Student t-test                                  | p = 0.96              |
| Supplementary Figure 1e  | I <sub>Camax</sub> vs C <sub>m</sub>                  | n =133 recordings, N = 78                                                            | Pearson correlation coefficient                            | r = -0.66 p < 0.00001 |
| Supplementary Figure 1e' | I <sub>rest</sub> vs C <sub>m</sub>                   | n =133 recordings, N = 78                                                            | Pearson correlation coefficient                            | r = -0.64 p < 0.00001 |
| Supplementary Figure 2c  | I <sub>Camax</sub> vs C <sub>m</sub>                  | n =53 recordings, N = 42                                                             | Pearson correlation coefficient                            | r = -0.56 p < 0.00001 |
| Supplementary Figure 2c  | I <sub>rest</sub> vs C <sub>m</sub>                   | n =53 recordings, N = 42                                                             | Pearson correlation coefficient                            | r = -0.52 p < 0.00001 |
| Supplementary Figure 4g  | I <sub>Camax</sub> vs C <sub>m</sub> perforated-patch | n = 14 recordings, N = 11                                                            | Pearson correlation coefficient                            | r = -0.79, p < 0.01   |
| Supplementary Figure 4g  | I <sub>Camax</sub> vs C <sub>m</sub> ruptured-patch   | n = 15 recordings, N = 6                                                             | Pearson correlation coefficient                            | r = -0.88, p < 0.001  |
| Supplementary Figure 4h  | I <sub>Camax</sub> vs C <sub>m</sub> perforated-patch | n = 14 recordings, N = 11                                                            | Pearson correlation coefficient                            | r = -0.55, p = 0.21   |
| Supplementary Figure 4h  | I <sub>Camax</sub> vs C <sub>m</sub> ruptured-patch   | n = 15 recordings, N = 6                                                             | Pearson correlation coefficient                            | r = -0.93, p < 0.001  |
| Supplementary Figure 6   | G <sub>m</sub> at -60mV                               | n = 56 recordings, N = 56                                                            | Pearson correlation coefficient                            | r = 0.78, p < 0.05    |
| Supplementary Figure 6   | G <sub>m</sub> at +20 mV                              | n = 56 recordings, N = 56                                                            | Pearson correlation coefficient                            | r = 0.77, p < 0.05    |

**Table S2 Summary table of the statistical tests used**

## Supplementary references

1. R. Giordano-Santini, C. Linton, M. A. Hilliard, Cell-cell fusion in the nervous system: Alternative mechanisms of development, injury, and repair. *Semin. Cell Dev. Biol.* **60**, 146–154 (2016).
2. L. Grant, E. Yi, J. D. Goutman, E. Glowatzki, Postsynaptic Recordings at Afferent Dendrites Contacting Cochlear Inner Hair Cells: Monitoring Multivesicular Release at a Ribbon Synapse. *J. Vis. Exp.* (2011), doi:10.3791/2442.
3. D. Zenisek, N. K. Horst, C. Merrifield, P. Sterling, G. Matthews, Visualizing synaptic ribbons in the living cell. *J. Neurosci. Off. J. Soc. Neurosci.* **24**, 9752–9759 (2004).
4. S. Jung, T. Oshima-Takago, R. Chakrabarti, A. B. Wong, Z. Jing, G. Yamanbaeva, M. M. Picher, S. M. Wojcik, F. Göttfert, F. Predoehl, K. Michel, S. W. Hell, S. Schoch, N. Strenzke, C. Wichmann, T. Moser, Rab3-interacting molecules 2 $\alpha$  and 2 $\beta$  promote the abundance of voltage-gated CaV1.3 Ca<sup>2+</sup> channels at hair cell active zones. *Proc. Natl. Acad. Sci.* **112**, E3141–E3149 (2015).
5. N. Strenzke, R. Chakrabarti, H. Al-Moyed, A. Müller, G. Hoch, T. Pangrsic, G. Yamanbaeva, C. Lenz, K.-T. Pan, E. Auge, R. Geiss-Friedlander, H. Urlaub, N. Brose, C. Wichmann, E. Reisinger, Hair cell synaptic dysfunction, auditory fatigue and thermal sensitivity in otoferlin Ile515Thr mutants. *EMBO J.* **35**, e201694564 (2016).
6. D. N. Mastronarde, Automated electron microscope tomography using robust prediction of specimen movements. *J. Struct. Biol.* **152**, 36–51 (2005).
7. J. R. Kremer, D. N. Mastronarde, J. R. McIntosh, Computer visualization of three-dimensional image data using IMOD. *J. Struct. Biol.* **116**, 71–76 (1996).
8. T. J. Deerinck, T. M. Shone, E. A. Bushong, R. Ramachandra, S. T. Peltier, M. H. Ellisman, High-performance serial block-face SEM of nonconductive biological samples enabled by focal gas injection-based charge compensation. *J. Microsc.* **270**, 142–149 (2018).



9. S. Michanski, K. Smaluch, A. Steyer, R. Chakrabarti, D. Oestreicher, C. Fischer, W. Möbius, Moser, Tobias, C. Vogl, C. Wichmann, Mapping developmental maturation of mouse inner hair cell ribbon synapses. *PNAS* (2019).
10. J. Schindelin, I. Arganda-Carreras, E. Frise, V. Kaynig, M. Longair, T. Pietzsch, S. Preibisch, C. Rueden, S. Saalfeld, B. Schmid, J.-Y. Tinevez, D. J. White, V. Hartenstein, K. Eliceiri, P. Tomancak, A. Cardona, Fiji: an open-source platform for biological-image analysis. *Nat. Methods*. **9**, 676–682 (2012).
11. I. Belevich, M. Joensuu, D. Kumar, H. Vihinen, E. Jokitalo, Microscopy Image Browser: A Platform for Segmentation and Analysis of Multidimensional Datasets. *PLOS Biol*. **14**, e1002340 (2016).
12. T. Anttonen, I. Belevich, A. Kirjavainen, M. Laos, C. Brakebusch, E. Jokitalo, U. Pirvola, How to bury the dead: elimination of apoptotic hair cells from the hearing organ of the mouse. *J. Assoc. Res. Otolaryngol. JARO*. **15**, 975–992 (2014).
13. R. Fettiplace, K. X. Kim, The physiology of mechano-electrical transduction channels in hearing. *Physiol. Rev*. **94**, 951–986 (2014).
14. T. Pangrsic, L. Lasarow, K. Reuter, H. Takago, M. Schwander, D. Riedel, T. Frank, L. M. Tarantino, J. S. Bailey, N. Strenzke, N. Brose, U. Müller, E. Reisinger, T. Moser, Hearing requires otoferlin-dependent efficient replenishment of synaptic vesicles in hair cells. *Nat. Neurosci*. **13**, 869–876 (2010).
15. N. T. Carnevale, M. L. Hines, *The NEURON Book* (Cambridge University Press, Cambridge, 2006; <http://ebooks.cambridge.org/ref/id/CBO9780511541612>).
16. I. J. Russell, P. M. Sellick, Low-frequency characteristics of intracellularly recorded receptor potentials in guinea-pig cochlear hair cells. *J. Physiol*. **338**, 179–206 (1983).
17. D. T. Gillespie, A general method for numerically simulating the stochastic time evolution of coupled chemical reactions. *J. Comput. Phys*. **22**, 403–434 (1976).

18. M. Beurg, M. G. Evans, C. M. Hackney, R. Fettiplace, A Large-Conductance Calcium-Selective Mechanotransducer Channel in Mammalian Cochlear Hair Cells. *J. Neurosci.* **26**, 10992–11000 (2006).
19. A. B. Wong, M. A. Rutherford, M. Gabrielaitis, T. Pangršič, F. Göttfert, T. Frank, S. Michanski, S. Hell, F. Wolf, C. Wichmann, T. Moser, Developmental refinement of hair cell synapses tightens the coupling of Ca<sup>2+</sup> influx to exocytosis. *EMBO J.* **33**, 247–264 (2014).
20. J. Neef, A. Gehrt, A. V. Bulankina, A. C. Meyer, D. Riedel, R. G. Gregg, N. Strenzke, T. Moser, The Ca<sup>2+</sup> Channel Subunit beta2 Regulates Ca<sup>2+</sup> Channel Abundance and Function in Inner Hair Cells and Is Required for Hearing. *J. Neurosci.* **29**, 10730 (2009).
21. M. Gabrielaitis, Mathematical modeling of the structure and function of inner hair cell ribbon synapses (2017) (available at <https://ediss.uni-goettingen.de/handle/11858/00-1735-0000-002B-7D2F-6>).
22. A. Brandt, D. Khimich, T. Moser, Few CaV1.3 channels regulate the exocytosis of a synaptic vesicle at the hair cell ribbon synapse. *J. Neurosci.* **25**, 11577 (2005).
23. T. Pangršič, M. Gabrielaitis, S. Michanski, B. Schwaller, F. Wolf, N. Strenzke, T. Moser, EF-hand protein Ca<sup>2+</sup> buffers regulate Ca<sup>2+</sup> influx and exocytosis in sensory hair cells. *Proc. Natl. Acad. Sci.* **112**, E1028–E1037 (2015).
24. T. Frank, M. A. Rutherford, N. Strenzke, A. Neef, T. Pangršič, D. Khimich, A. Fejtova, E. D. Gundelfinger, M. C. Liberman, B. Harke, K. E. Bryan, A. Lee, A. Egner, D. Riedel, T. Moser, Bassoon and the synaptic ribbon organize Ca<sup>2+</sup> channels and vesicles to add release sites and promote refilling. *Neuron.* **68**, 724–738 (2010).
25. S. Jung, T. Maritzen, C. Wichmann, Z. Jing, A. Neef, N. H. Revelo, H. Al-Moyed, S. Meese, S. M. Wojcik, I. Panou, H. Bulut, P. Schu, R. Ficner, E. Reisinger, S. O. Rizzoli, J. Neef, N. Strenzke, V. Haucke, T. Moser, Disruption of adaptor protein 2μ (AP-2μ) in cochlear hair cells impairs vesicle reloading of synaptic release sites and hearing. *EMBO J.* **34**, 2686–2702 (2015).

26. B. N. Buran, N. Strenzke, A. Neef, E. D. Gundelfinger, T. Moser, M. C. Liberman, Onset coding is degraded in auditory nerve fibers from mutant mice lacking synaptic ribbons. *J. Neurosci. Off. J. Soc. Neurosci.* **30**, 7587–7597 (2010).
27. P. X. Joris, P. H. Smith, T. C. Yin, Enhancement of neural synchronization in the anteroventral cochlear nucleus. II. Responses in the tuning curve tail. *J. Neurophysiol.* **71**, 1037–1051 (1994).
28. N. Strenzke, S. Chanda, C. Kopp-Scheinflug, D. Khimich, K. Reim, A. V. Bulankina, A. Neef, F. Wolf, N. Brose, M. A. Xu-Friedman, T. Moser, Complexin-I Is Required for High-Fidelity Transmission at the Endbulb of Held Auditory Synapse. *J. Neurosci.* **29**, 7991–8004 (2009).
29. M. C. Liberman, Central projections of auditory-nerve fibers of differing spontaneous rate. I. Anteroventral cochlear nucleus. *J. Comp. Neurol.* **313**, 240–258 (1991).
30. Y. Yang, B. Ramamurthy, A. Neef, M. A. Xu-Friedman, Low Somatic Sodium Conductance Enhances Action Potential Precision in Time-Coding Auditory Neurons. *J. Neurosci.* **36**, 11999–12009 (2016).
31. A. M. Taberner, M. C. Liberman, Response Properties of Single Auditory Nerve Fibers in the Mouse. *J. Neurophysiol.* **93**, 557–569 (2005).
32. G. Ehret, M. Frankenreiter, Quantitative analysis of cochlear structures in the house mouse in relation to mechanisms of acoustical information processing. *J. Comp. Physiol.* **122**, 65–85 (1977).
33. H. M. Schmitz, S. B. Johnson, P. A. Santi, Kanamycin-Furosemide Ototoxicity in the Mouse Cochlea: A 3-Dimensional Analysis. *Otolaryngol. Neck Surg.* **150**, 666–672 (2014).
34. H. C. Ou, G. W. Harding, B. A. Bohne, An anatomically based frequency–place map for the mouse cochlea. *Hear. Res.* **145**, 123–129 (2000).
35. M. Müller, K. von Hünenbein, S. Hoidis, J. W. T. Smolders, A physiological place-frequency map of the cochlea in the CBA/J mouse. *Hear. Res.* **202**, 63–73 (2005).

36. V. A. Lukashkina, S. Levic, A. N. Lukashkin, N. Strenzke, I. J. Russell, A connexin30 mutation rescues hearing and reveals roles for gap junctions in cochlear amplification and micromechanics. *Nat. Commun.* **8**, 14530 (2017).
37. N. He, J. R. Dubno, J. H. Mills, Frequency and intensity discrimination measured in a maximum-likelihood procedure from young and aged normal-hearing subjects. *J. Acoust. Soc. Am.* **103**, 553–565 (1998).
38. O. Stakhovskaya, D. Sridhar, B. H. Bonham, P. A. Leake, Frequency Map for the Human Cochlear Spiral Ganglion: Implications for Cochlear Implants. *J. Assoc. Res. Otolaryngol.* **8**, 220–233 (2007).
